# Supplementary material for: Analysis of Outcomes After Endovascular Abdominal Aortic Aneurysm Repair in Patients With Abnormal Findings on the First Postoperative Computed Tomography Angiography
Source: PubMed Central journal article supplement (PMC8573614; doi:10.1177/15266028211030539), 2021-07-28
Supplement: sj-pdf-1-jet-10.1177_15266028211030539.pdf [file sj-pdf-1-jet-10.1177_15266028211030539.pdf]

## Supplemental Figure legends

Supplemental Figure 1: Kaplan-Meier for freedom from secondary intervention according to change in abdominal aortic aneurysm diameter (Log rank;  $P < .001$ ). All standard errors at each time point are below 10%.

Supplemental Figure 2: Kaplan-Meier for overall survival according to change in abdominal aortic aneurysm diameter (Log rank;  $P < .931$ ). All standard errors at each time point are below 10%.
