# Supplementary material for: Analysis of Outcomes After Endovascular Abdominal Aortic Aneurysm Repair in Patients With Abnormal Findings on the First Postoperative Computed Tomography Angiography
Source: PubMed Central journal article supplement (PMC8573614; doi:10.1177/15266028211030539), 2021-07-28
Supplement: sj-pdf-2-jet-10.1177_15266028211030539.pdf [file sj-pdf-2-jet-10.1177_15266028211030539.pdf]

Supplemental Table 1: Surveillance protocols in participating medical centers

| Centre | First imaging                                                                                                                                                                                       | Yearly thereafter                                                                                          |
|--------|-----------------------------------------------------------------------------------------------------------------------------------------------------------------------------------------------------|------------------------------------------------------------------------------------------------------------|
| 1      | A CT angiogram (CTA) after 4-6 weeks and clinical visit. No abnormalities: yearly Duplex ultrasound (DUS). Abnormalities: CTA is repeated.<br><br>Endoleak type I/III: intervention.                | DUS                                                                                                        |
| 2      | Two-week clinical visit. A CTA, plain film x-ray and clinical review at 3 months post-procedure. CTA at 12 months. DUS + plain film x-ray at years 2,3 and 5.<br><br>CTA at 5-years post-procedure. | DUS, 1/5 years CTA                                                                                         |
| 3      | 6 weeks CTA. No abnormalities: DUS after 6 months and thereafter yearly. Type I endoleak: intervention or strict surveillance, type II: normal follow-up.                                           | DUS, CTA if new endoleak and/or sac size increase                                                          |
| 4      | First day after discharge consultation via telephone. Clinical visit after two weeks.<br><br>Six weeks clinical review + CTA.                                                                       | DUS                                                                                                        |
| 5      | CTA after 4 weeks.                                                                                                                                                                                  | DUS + Ankle-Brachial index (ABI) + biplanar plain film x-ray. CTA if new endoleak and/or sac size increase |

|    |                                                                                                                              |                                                     |
|----|------------------------------------------------------------------------------------------------------------------------------|-----------------------------------------------------|
| 6  | Clinical visit + DUS 6-8 weeks. DUS after 3 months.                                                                          | DUS + plain film x-ray every 2 years                |
| 7  | CTA at 6 weeks, color-flow DUS at 6 months                                                                                   | Color-flow DUS<br>On indication: CTA                |
| 8  | CTA at 4 weeks and 12 months                                                                                                 | DUS                                                 |
| 9  | CTA at 4 weeks and 12 months                                                                                                 | DUS                                                 |
| 10 | CTA at 4 weeks and 12 months                                                                                                 | DUS, 1/5 years CTA                                  |
| 11 | 6-week clinical visit + CTA.                                                                                                 | DUS or CTA every 5 years                            |
| 12 | CTA at 6 weeks, CTA or DUS + plain film x-ray at 6 months                                                                    | DUS + plain film x-ray                              |
| 13 | 6-week clinical visit + DUS, DUS at 3 months                                                                                 | DUS                                                 |
| 14 | CTA at 4 weeks and 12 months. No abnormalities: yearly DUS. Abnormalities:<br>CTA at 3 months, endoleak I/III: intervention. | DUS                                                 |
| 15 | CTA at 6 weeks + biplanar plain film x-ray. DUS at 6 months                                                                  | DUS<br>CTA if sac size increase                     |
| 16 | Pre-discharge: biplanar plain film x-ray. CTA at 6 weeks, CTA at 12 months +<br>biplanar plain film x-ray.                   | DUS<br>CTA if new endoleak and/or sac size increase |

Abnormalities first CTA:

- Type I endoleak: intervention
- Type II endoleak: strict follow-up protocol
- After 6 months: biplanar plain film x-ray + CT, if sac size increase >10%  
→ CTA
- After 12 months: biplanar plain film x-ray + CT

- No abnormalities first CTA:

- Minimal follow-up
- After 12 months: biplanar plain film x-ray + CT
