# Supplementary material for: Analysis of Outcomes After Endovascular Abdominal Aortic Aneurysm Repair in Patients With Abnormal Findings on the First Postoperative Computed Tomography Angiography
Source: PubMed Central journal article supplement (PMC8573614; doi:10.1177/15266028211030539), 2021-07-28
Supplement: sj-pdf-3-jet-10.1177_15266028211030539.pdf [file sj-pdf-3-jet-10.1177_15266028211030539.pdf]

Supplemental Table 2: univariable and multivariable analysis after imputation (all-cause mortality and secondary interventions)

|                      | Univariable analysis |               |                         |               | Multivariable analysis |               |                         |               |
|----------------------|----------------------|---------------|-------------------------|---------------|------------------------|---------------|-------------------------|---------------|
|                      | Mortality            |               | Secondary interventions |               | Mortality              |               | Secondary interventions |               |
|                      | <i>Hazard ratio</i>  | <i>95% CI</i> | <i>Hazard ratio</i>     | <i>95% CI</i> | <i>Hazard ratio</i>    | <i>95% CI</i> | <i>Hazard ratio</i>     | <i>95% CI</i> |
| Age*                 | 1.060                | 1.041-1.079   | 0.987                   | 0.968-1.007   | 1.064                  | 1.045-1.083   |                         |               |
| Gender               | 0.956                | 0.690-1.322   | 0.783                   | 0.522-1.175   |                        |               |                         |               |
| ASA I/II             | Reference            | Reference     | Reference               | Reference     | Reference              | Reference     | Reference               | Reference     |
| ASA III              | 1.070                | 0.836-1.371   | 1.187                   | 0.859-1.641   | 1.100                  | 0.854-1.416   | 0.945                   | 0.644-1.387   |
| ASA IV*/**           | 2.899                | 1.814-4.633   | 3.166                   | 1.765-5.678   | 3.203                  | 1.994-5.145   | 2.598                   | 1.297-5.204   |
| Neck length**        | 1.034                | 0.929-1.151   | 0.792                   | 0.675-0.930   |                        |               | 0.790                   | 0.665-0.939   |
| Endurant (Medtronic) | Reference            | Reference     | Reference               | Reference     | Reference              | Reference     | Reference               | Reference     |
| Talent (Medtronic)   | 0.640                | 0.382-1.072   | 0.642                   | 0.306-1.346   | 0.736                  | 0.438-1.235   | 0.570                   | 0.225-1.444   |
| Excluder (Gore)*/**  | 0.706                | 0.505-0.986   | 0.733                   | 0.467-1.150   | 0.706                  | 0.505-0.987   | 0.566                   | 0.327-0.982   |
| Zenith (Cook)*       | 0.707                | 0.537-0.930   | 0.959                   | 0.674-1.365   | 0.679                  | 0.513-0.898   | 1.008                   | 0.663-1.532   |
| Other                | 0.413                | 0.181-0.939   | 0.953                   | 0.435-2.087   | 0.480                  | 0.210-1.093   | 0.985                   | 0.390-2.486   |
| AAA diameter         | 1.048                | 0.949-1.159   | 1.111                   | 0.979-1.262   |                        |               |                         |               |

|                        |           |             |           |             |  |  |           |             |
|------------------------|-----------|-------------|-----------|-------------|--|--|-----------|-------------|
| Maximum iliac diameter | 1.056     | 0.894-1.246 | 1.212     | 0.993-1.479 |  |  |           |             |
| Change in AAA diameter |           |             |           |             |  |  |           |             |
| Stable or decrease     | Reference | Reference   | Reference | Reference   |  |  | Reference | Reference   |
| Increase**             | 1.013     | 0.756-1.357 | 2.335     | 1.687-3.232 |  |  | 2.429     | 1.683-3.505 |

Abbreviations: AAA; abdominal aortic aneurysm, ASA; American Society of Anesthesiologists, CI; confidence interval

\*variables significantly related to mortality in multivariable analysis

\*\*variables significantly related to secondary interventions in multivariable analysis
